# Supplementary material for: Design Parameters to Control Synthetic Gene Expression in Escherichia coli
Source: PLoS One. 2009 Sep 14;4(9):e7002. doi: 10.1371/journal.pone.0007002 (PMC2736378; doi:10.1371/journal.pone.0007002)
Supplement: Table S1 — Expression data, sequences, and selected sequence characteristics of all polymerase and scFv variants. Variants beginning with “A” are scFv genes. Those beginning with “P” are polymerase genes. Column 2 shows the calculated average expression level relative to the highest expressing variant for the same gene set (set to 3). Columns 3 & 4 show the calculated absolute expression level and standard error (minimum of 3 independent determinations). Columns 5–7 indicate which variants were included in datasets used for PLS modeling for the figures indicated. Columns 8 & 9 show the calculated GC content and codon adaptation index (CAI) [7], respectively, for each variant. Columns 10 & 11 show the number of occurrences of codons used at <10% per amino acid in naturally highly-expressed and all E. coli genes [5], [47], respectively. Column 12 shows the number of occurrences of contiguous runs of G and/or C of 7 or more nucleotides. Columns 13 & 14 show the strongest and average RNA structure strength for all 50 nucleotide frames along the mRNA open reading frame region. Columns 15 & 16 show calculated mRNA structure strengths for two 5′ mRNA windows, one including sequence from 5′ to the ribosome binding site to 50 nucleotides into the open reading frame (−42 to +50) and one identical to that shown to correlate best with expression of GFP variants [11]. All RNA structure strengths are optimal predicted structures calculated using the Vienna RNAfold software package using parameters from Mathews, et al [46]. Column 17 includes the complete DNA sequences of the variant open reading frames and those for the 5′ and 3′ untranslated regions listed in the bottom three columns of the table. (0.14 MB XLS) [file pone.0007002.s001.xls]

## Sheet: Supporting Table 1
Variant	Relative Expression (Norm to High=3)	Absolute Expression, mg/ml	se	Included in polymerasePLS (Fig2A)	Included in scFv PLS (Figs2B&4)	Included in Combined PLS (Figs2C,5,&6)	GC%	CAI	Rare Codons, HE_coli	Rare Codons, Genomic_coli	GC7	RNA MIN_ORF	RNA Avg_ORF	RNA Structure -42 to +50	RNA Structure -4 to +38	Sequence
A1	2.74704	206.47	24.6353		Y	Y	57.41	0.724997	2	0	2	-20.1	-11.7721	-13	-7.1	ATGAAACAAAGCACCATTGCACTGGCACTGCTGCCGCTGCTGTTTACGCCGGTCACGAAGGCGGAGGTCCAATTGGTTGAAAGCGGCGGTGGTCTGGTCCAACCGGGTGGTAGCCTGCGCCTGAGCTGTGCCGCAAGCGGCTTTACCTTCAGCAGCTATACCATGAGCTGGGTGCGCCAAGCACCGGGCAAACGTCTGGAATGGGTTGCGTACATTGATTATGGTGGTGACTTCACGAGCTACAGCGATGCCATCCGCGGTCGTTTCACGATCAGCCGTGATAATGCCAAGAACACGCTGTACCTGCAGATGAACAGCCTGCGTGCGGAAGATACCGCAATTTACTACTGCAGCCGCCGTCGTTACGACGCCATGGACTATTGGGGTCAGGGTACGCTG…
A2	0.180809	13.5898	4.03871		Y	Y	51.72	0.459584	53	4	3	-22.96	-9.6073	-15	-7.9	ATGAAGCAGAGCACCATCGCCTTGGCCTTGCTGCCCCTTCTGTTCACCCCGGTAACCAAGGCCGAGGTTCAATTGGTCGAGAGCGGGGGAGGTCTGGTGCAACCTGGCGGTAGTTTACGTTTATCTTGTGCGGCTTCGGGTTTCACGTTCTCGTCTTACACAATGAGTTGGGTACGTCAAGCGCCAGGCAAACGTTTGGAATGGGTCGCTTACATCGATTACGGAGGCGATTTCACCTCATATAGCGATGCAATTCGAGGCCGTTTTACCATATCACGTGACAACGCCAAGAATACGCTCTATCTTCAGATGAATAGTTTACGCGCCGAAGACACCGCGATCTACTACTGTTCACGGCGACGTTACGACGCGATGGATTATTGGGGCCAGGGTACCTTG…
A3	0.654429	49.1876	7.23004		Y	Y	54.92	0.807714	2	0	12	-21	-10.7648	-12.7	-6.9	ATGAAACAGTCCACCATCGCGCTGGCACTGCTGCCGCTGCTGTTTACCCCGGTAACCAAAGCGGAGGTTCAATTGGTGGAATCCGGTGGCGGTCTGGTACAGCCGGGTGGTTCCCTGCGCCTGTCCTGTGCTGCGTCCGGTTTCACTTTTAGCAGCTACACTATGTCTTGGGTTCGTCAGGCACCGGGCAAACGTCTGGAATGGGTTGCGTATATTGACTATGGTGGTGATTTCACCTCTTACTCCGATGCGATCCGCGGCCGTTTCACCATCAGCCGCGACAACGCTAAAAACACTCTGTACCTGCAGATGAACTCCCTGCGCGCGGAAGACACTGCAATCTATTATTGCAGCCGTCGCCGCTACGACGCGATGGACTATTGGGGTCAGGGCACCCTG…
A4	1.45231	109.157	11.0556		Y	Y	53.26	0.566899	36	0	14	-22.7	-10.2324	-11.6	-6.2	ATGAAACAAAGCACTATTGCTCTGGCTCTGCTTCCATTGTTATTTACCCCGGTGACTAAAGCCGAGGTGCAATTGGTAGAATCCGGTGGGGGGCTCGTCCAGCCAGGCGGCTCCCTCCGTCTGTCTTGCGCGGCGTCTGGCTTCACGTTTTCCTCGTACACGATGAGTTGGGTTCGCCAGGCCCCGGGCAAGCGCTTGGAATGGGTAGCTTACATCGACTATGGTGGCGACTTCACTTCTTACTCGGATGCCATCCGTGGACGTTTTACTATCTCCCGTGATAACGCCAAAAACACCCTGTATTTGCAGATGAACAGTCTGCGCGCCGAAGATACGGCAATTTACTATTGTTCCCGTCGCCGTTACGATGCGATGGATTATTGGGGGCAAGGCACCCTG…
A5	1.37291	103.189	10.6705		Y	Y	51.95	0.712258	15	0	2	-19.9	-9.12695	-12.2	-6.2	ATGAAACAAAGCACTATTGCTCTGGCTCTGCTTCCACTTCTGTTTACCCCGGTTACCAAAGCAGAAGTTCAATTGGTTGAGAGTGGTGGGGGCCTGGTGCAGCCTGGTGGTTCTCTGCGTCTGTCTTGCGCAGCGTCCGGTTTCACGTTCAGCTCATACACCATGTCGTGGGTACGTCAAGCACCGGGCAAACGTCTGGAATGGGTAGCATACATTGATTACGGCGGTGATTTCACTTCCTATTCCGACGCGATCCGTGGCCGCTTCACCATCTCCCGTGACAACGCTAAAAACACCTTGTACTTGCAGATGAACTCTCTTCGTGCTGAAGATACCGCAATTTACTATTGTAGCCGCCGTCGTTACGATGCCATGGATTACTGGGGCCAAGGCACCCTG…
A6	1.28154	96.3221	11.785		Y	Y	54.92	0.868004	2	0	5	-24.2	-9.97084	-12.9	-6.2	ATGAAACAGTCCACCATCGCGCTGGCGCTGCTGCCGCTGCTGTTCACCCCGGTTACCAAAGCGGAAGTGCAATTGGTTGAGTCTGGTGGCGGCCTGGTGCAGCCGGGCGGTTCCCTGCGCCTGTCCTGTGCTGCGTCTGGCTTCACTTTCTCTTCCTACACCATGTCCTGGGTGCGTCAGGCTCCGGGCAAACGTCTGGAATGGGTTGCTTATATCGATTACGGTGGCGATTTCACTTCCTACTCCGATGCTATCCGTGGTCGTTTCACTATCTCCCGTGATAACGCTAAAAACACCCTGTATCTGCAGATGAACTCTCTGCGCGCTGAAGATACCGCTATCTACTACTGCTCCCGCCGTCGTTATGATGCTATGGATTACTGGGGTCAGGGCACCCTG…
A7	nd	nd			N	N	56.46	0.723342	2	0	13	-25.5	-11.6634	-13.3	-7.1	ATGAAACAAAGCACGATTGCACTGGCACTGCTGCCGCTGCTGTTTACCCCGGTGACCAAAGCGGAAGTGCAATTGGTGGAAAGCGGTGGCGGCCTGGTGCAACCGGGCGGTAGCCTGCGCCTGAGCTGTGCCGCGAGCGGTTTTACCTTTAGCAGCTATACGATGAGCTGGGTCCGCCAGGCACCGGGTAAACGTCTGGAATGGGTTGCGTATATCGACTACGGTGGCGATTTCACCAGCTATAGCGACGCGATCCGTGGCCGTTTTACCATTAGCCGCGATAATGCAAAAAACACCCTGTACCTGCAAATGAACAGCCTGCGTGCGGAGGACACCGCGATTTACTACTGCAGCCGCCGTCGTTACGATGCAATGGATTATTGGGGCCAGGGTACGCTG…
A8	nd	nd			N	N	51.6	0.487176	42	4	10	-20	-9.20431	-10.1	-6.3	ATGAAGCAATCGACGATCGCGCTGGCCCTGCTGCCACTGTTGTTCACCCCAGTCACAAAGGCAGAAGTGCAATTGGTTGAATCAGGCGGTGGATTGGTCCAACCTGGTGGCAGTCTGCGACTGTCATGCGCGGCGTCAGGGTTTACCTTCAGCAGTTATACGATGTCATGGGTCCGACAAGCGCCGGGTAAACGTCTGGAATGGGTCGCGTATATCGACTACGGCGGTGACTTTACCTCATATTCTGATGCAATTCGTGGTCGGTTTACTATCAGCCGGGATAATGCCAAAAACACACTGTATCTCCAAATGAACTCCCTGCGCGCAGAAGATACGGCGATTTATTATTGCAGTCGTCGGCGTTATGATGCGATGGATTATTGGGGTCAGGGCACGCTA…
A9	1.856	139.499	13.6352		Y	Y	55.39	0.828426	2	0	0	-18.4	-10.3627	-12.3	-5	ATGAAACAGTCTACTATCGCACTGGCTCTGCTGCCGCTGCTGTTTACCCCGGTTACCAAGGCTGAGGTTCAATTGGTTGAATCTGGTGGCGGTCTGGTACAGCCGGGTGGTTCCCTGCGTCTGTCCTGTGCGGCTTCCGGCTTCACCTTCAGCTCTTATACCATGAGCTGGGTGCGTCAGGCTCCGGGTAAGCGCCTGGAATGGGTGGCTTACATCGACTATGGTGGCGACTTCACCTCCTATTCCGACGCTATCCGTGGTCGTTTCACTATCTCTCGCGATAACGCGAAGAACACCCTGTACCTGCAGATGAACTCTCTGCGCGCTGAGGACACTGCAATTTACTACTGCTCCCGTCGTCGCTACGACGCTATGGACTATTGGGGCCAGGGCACTCTG…
A10	0.917496	68.96	15.5347		Y	Y	54.21	0.563472	37	0	1	-27.7	-10.6508	-11.5	-5.8	ATGAAGCAATCGACCATCGCACTGGCCCTCTTGCCTCTCCTCTTCACCCCGGTGACAAAAGCAGAGGTGCAATTGGTGGAGAGCGGAGGCGGCCTCGTGCAACCAGGGGGTAGCCTGCGTCTGTCCTGCGCTGCGTCCGGGTTCACCTTTTCCTCCTACACTATGTCATGGGTTCGTCAGGCTCCGGGTAAGCGCCTGGAATGGGTTGCTTACATCGACTATGGAGGGGATTTCACCTCATACAGTGACGCAATCCGTGGCCGCTTCACCATCAGCCGTGACAACGCTAAAAATACCCTGTACCTGCAGATGAACTCTCTGCGTGCGGAAGACACGGCTATCTATTACTGTTCACGCCGTCGTTATGATGCGATGGACTATTGGGGACAGGGCACGCTT…
A11	nd	nd			N	N	58	0.72532	2	0	14	-22.1	-12.0575	-14.5	-7.3	ATGAAACAGAGCACGATCGCGCTGGCGCTGCTGCCGCTGCTGTTCACGCCGGTGACGAAGGCCGAAGTCCAATTGGTGGAAAGCGGCGGTGGTCTGGTTCAACCGGGTGGCAGCCTGCGCCTGAGCTGTGCGGCGAGCGGTTTCACCTTCAGCAGCTATACCATGAGCTGGGTTCGCCAAGCACCGGGTAAGCGTCTGGAGTGGGTTGCATACATCGACTATGGTGGCGATTTTACCAGCTACAGCGACGCAATCCGTGGCCGCTTCACCATCAGCCGTGATAATGCAAAAAACACCCTGTACCTGCAGATGAACAGCCTGCGTGCGGAGGATACGGCAATCTACTATTGCAGCCGTCGCCGCTACGATGCAATGGACTACTGGGGCCAAGGCACCCTG…
A12	1.5316	115.117	17.8344		Y	Y	49.7	0.41732	59	6	14	-23.8	-9.35811	-9.99	-1.7	ATGAAACAATCTACCATTGCATTAGCATTACTTCCCCTTCTTTTTACGCCCGTGACGAAAGCGGAGGTACAATTGGTTGAAAGCGGCGGAGGCTTAGTGCAACCCGGAGGCTCACTCCGATTAAGCTGCGCCGCATCCGGTTTTACTTTTTCGTCCTATACGATGTCATGGGTGCGTCAGGCGCCAGGGAAACGATTAGAATGGGTCGCTTATATCGACTATGGCGGTGACTTTACATCCTATTCAGACGCCATCCGTGGACGCTTCACCATATCCCGAGATAACGCTAAGAACACTCTTTATCTTCAAATGAATAGCCTGCGAGCGGAGGATACGGCAATCTACTATTGCAGTCGCCGCCGTTACGATGCTATGGATTACTGGGGGCAAGGTACACTT…
A13	0.841538	63.2509	7.88057		Y	Y	50.65	0.47825	48	5	1	-19.3	-9.58562	-10	-1.5	ATGAAACAATCTACTATTGCGCTTGCGTTACTGCCTCTTCTTTTTACCCCAGTAACCAAAGCGGAAGTGCAATTGGTTGAATCTGGTGGCGGATTGGTGCAGCCGGGAGGAAGCCTGAGATTGAGCTGTGCGGCGTCGGGGTTCACATTTTCCTCATACACGATGAGTTGGGTGAGACAAGCGCCAGGCAAACGCCTGGAATGGGTAGCCTATATCGACTATGGCGGCGATTTTACGTCCTATAGTGATGCCATCAGAGGGCGCTTTACGATTTCCCGCGATAACGCTAAAAACACCTTGTATCTTCAAATGAATAGTCTGCGTGCGGAAGATACCGCAATCTACTATTGTTCTCGCAGACGCTATGACGCAATGGACTACTGGGGCCAGGGTACCTTA…
A14	nd	nd			N	N	57.05	0.746719	2	0	3	-28.2	-12.1613	-16.2	-8.6	ATGAAGCAGAGCACCATCGCGCTGGCACTGCTGCCGCTGCTGTTCACCCCGGTGACGAAAGCCGAGGTCCAATTGGTTGAAAGCGGTGGCGGCCTGGTTCAGCCGGGTGGTAGCCTGCGCCTGAGCTGCGCCGCGAGCGGCTTCACCTTCAGCAGCTACACCATGAGCTGGGTCCGTCAGGCACCGGGTAAACGCCTGGAATGGGTGGCCTATATCGACTATGGCGGTGATTTTACCAGCTATAGCGATGCGATTCGTGGCCGTTTCACCATTAGCCGCGACAATGCCAAAAACACGCTGTACCTGCAAATGAATAGCCTGCGTGCAGAAGATACCGCAATTTATTATTGCAGCCGTCGTCGCTATGATGCGATGGATTACTGGGGTCAAGGTACGCTG…
A15	0.466795	35.0848	8.53007		Y	Y	54.32	0.862833	2	0	16	-24	-9.47311	-12.14	-5	ATGAAACAGTCTACCATTGCTCTGGCTCTGCTGCCGCTGCTGTTTACTCCGGTGACTAAAGCTGAAGTTCAATTGGTTGAATCTGGCGGCGGCCTGGTGCAGCCGGGCGGCTCCCTGCGTCTGTCCTGCGCTGCTTCCGGTTTCACTTTCTCCTCTTACACCATGTCCTGGGTGCGCCAGGCGCCGGGTAAACGTCTGGAATGGGTGGCTTACATTGATTATGGTGGTGATTTTACTTCCTACTCTGATGCTATTCGTGGTCGCTTCACCATCTCTCGCGATAACGCGAAAAACACTCTGTATCTGCAGATGAACTCCCTGCGCGCTGAAGACACCGCTATCTACTACTGCTCTCGTCGTCGCTACGATGCTATGGATTATTGGGGTCAGGGTACTCTG…
A16	nd	nd			N	N	54.56	0.722211	16	0	10	-19.2	-10.429	-17.79	-10.2	ATGAAGCAGTCCACCATCGCCCTGGCACTGCTGCCGCTCCTTTTCACTCCGGTTACAAAGGCGGAAGTGCAATTGGTAGAATCTGGCGGTGGTCTTGTGCAACCGGGCGGTAGCCTGCGTCTGTCGTGCGCAGCTTCTGGTTTTACCTTCTCCTCTTATACCATGAGCTGGGTGCGTCAGGCCCCGGGCAAACGTTTGGAATGGGTGGCATACATCGATTACGGTGGCGATTTCACTTCCTACTCCGACGCGATCCGCGGTCGTTTCACCATTAGCCGTGACAATGCGAAAAACACTCTGTACCTGCAGATGAACTCACTGCGCGCGGAAGACACTGCAATCTACTACTGCTCTCGTCGTCGCTATGATGCGATGGACTACTGGGGTCAGGGTACTCTG…
A17	0.616898	46.3667	15.3477		Y	Y	53.73	0.821777	2	0	8	-23.7	-10.5142	-10.89	-4.5	ATGAAACAGTCCACTATCGCTCTGGCTCTGCTGCCTCTGCTGTTTACCCCGGTTACCAAAGCGGAGGTTCAATTGGTTGAATCCGGCGGTGGTCTGGTTCAGCCAGGCGGTTCCCTGCGTCTGTCTTGTGCCGCCTCTGGTTTTACCTTTTCCTCCTACACTATGAGCTGGGTGCGCCAGGCGCCGGGTAAACGTCTGGAATGGGTTGCGTACATCGATTACGGCGGCGACTTTACTTCTTACTCTGACGCGATTCGTGGCCGTTTCACCATTAGCCGTGACAACGCGAAAAATACTCTGTATCTGCAGATGAACAGCCTGCGTGCGGAAGACACCGCTATCTACTACTGTTCTCGTCGTCGTTACGATGCTATGGACTACTGGGGCCAGGGCACCCTG…
A18	0.598197	44.9611	3.05735		Y	Y	54.21	0.767743	2	0	7	-19.41	-10.1734	-13.6	-8.6	ATGAAGCAATCTACCATTGCCCTGGCACTGCTGCCACTGCTGTTCACTCCAGTGACCAAAGCGGAGGTCCAATTGGTAGAGTCCGGTGGTGGCCTGGTCCAGCCGGGCGGTTCTCTGCGCCTGTCTTGTGCTGCATCCGGTTTCACCTTCTCTAGCTATACCATGTCTTGGGTTCGTCAGGCTCCGGGCAAACGTCTGGAATGGGTTGCTTACATCGATTACGGCGGTGACTTTACCTCCTACAGCGACGCAATTCGCGGCCGTTTTACCATCTCTCGTGACAATGCAAAAAATACCCTGTACCTGCAGATGAATAGCCTGCGTGCGGAAGATACCGCAATCTACTACTGCAGCCGTCGTCGTTACGACGCTATGGACTATTGGGGTCAAGGTACTCTG…
A19	nd	nd			N	N	55.99	0.804845	2	0	9	-20.2	-10.7455	-14.6	-8.4	ATGAAGCAGAGCACTATTGCACTGGCCCTGCTGCCGCTGCTGTTTACCCCGGTGACCAAAGCTGAAGTTCAATTGGTGGAATCCGGTGGCGGCCTGGTCCAGCCGGGTGGTTCCCTGCGTCTGAGCTGTGCAGCATCCGGCTTCACGTTCTCCTCTTACACCATGTCCTGGGTCCGCCAGGCTCCGGGTAAACGCCTGGAATGGGTTGCGTACATCGACTACGGTGGTGACTTCACCTCCTATTCTGATGCTATCCGTGGCCGCTTCACCATCAGCCGCGACAACGCGAAAAACACTCTGTATCTGCAGATGAACTCTCTGCGTGCAGAGGATACCGCCATTTATTACTGCTCTCGTCGTCGTTACGACGCTATGGACTATTGGGGTCAGGGCACTCTG…
A20	0.528308	39.7082	6.53994		Y	Y	53.73	0.793032	2	0	2	-18.8	-10.624	-12.8	-6.2	ATGAAACAGTCCACCATTGCGCTGGCGCTGCTGCCGCTGCTGTTTACCCCGGTGACTAAGGCGGAGGTTCAATTGGTAGAATCTGGTGGCGGTCTGGTTCAGCCGGGTGGTTCCCTGCGCCTGAGCTGTGCAGCTTCTGGTTTTACTTTTTCCTCCTATACTATGTCTTGGGTACGCCAGGCTCCGGGTAAGCGTCTGGAATGGGTGGCTTACATTGACTATGGTGGTGACTTCACTAGCTACTCTGATGCAATCCGCGGTCGTTTTACTATCAGCCGTGATAACGCAAAAAACACCCTGTACCTGCAGATGAACTCCCTGCGCGCAGAAGATACTGCGATTTACTACTGCAGCCGCCGTCGTTATGACGCGATGGACTATTGGGGCCAGGGTACTCTG…
A21	2.03077	152.635	15.2523		Y	Y	53.97	0.676791	2	0	0	-18.1	-10.3916	-11.8	-6.2	ATGAAACAATCTACTATTGCGCTGGCGCTGCTGCCGCTGCTGTTCACGCCAGTCACCAAGGCGGAGGTTCAATTGGTCGAAAGCGGTGGTGGTCTGGTGCAGCCTGGTGGCTCCCTGCGTCTGTCCTGTGCCGCCTCCGGCTTTACGTTCTCTAGCTATACCATGTCCTGGGTTCGCCAAGCCCCTGGTAAGCGTCTGGAATGGGTCGCTTACATCGACTACGGTGGTGACTTCACCTCCTACTCCGACGCGATTCGCGGTCGCTTCACGATTTCTCGCGACAATGCGAAGAACACGCTGTACCTGCAAATGAACTCTCTGCGCGCTGAGGACACTGCGATTTACTATTGTAGCCGTCGTCGCTACGATGCCATGGACTATTGGGGTCAAGGTACGCTG…
A22	0.898918	67.5636	6.54692		Y	Y	51.48	0.420883	57	1	2	-20.6	-9.09199	-10	-6.6	ATGAAACAATCGACTATAGCCTTAGCGTTGTTGCCACTGCTGTTCACGCCCGTCACAAAGGCAGAAGTACAATTGGTCGAATCTGGTGGCGGCTTGGTTCAACCGGGTGGTTCGTTGCGTCTCAGCTGCGCCGCTTCGGGGTTTACTTTCTCCTCCTATACAATGTCCTGGGTACGTCAAGCACCTGGCAAACGCTTAGAGTGGGTGGCGTATATTGACTATGGAGGTGATTTTACGAGCTATAGCGACGCGATTCGCGGTCGCTTTACTATTAGCCGCGACAATGCAAAAAACACACTTTACCTCCAGATGAACTCTCTTCGGGCCGAGGACACAGCCATCTATTATTGCTCTCGGCGTCGTTATGATGCAATGGATTATTGGGGCCAAGGCACTCTT…
A23	1.53062	115.043	12.2598		Y	Y	56.7	0.800006	2	0	8	-22.2	-10.8566	-13.31	-7.1	ATGAAACAAAGCACTATTGCGCTGGCTCTGCTGCCGCTGCTGTTCACGCCGGTGACCAAGGCCGAGGTTCAATTGGTTGAAAGCGGTGGTGGCCTGGTGCAGCCGGGTGGTTCTCTGCGTCTGTCTTGCGCTGCGAGCGGCTTCACCTTCTCTTCCTACACCATGTCTTGGGTACGTCAGGCTCCAGGCAAACGTCTGGAGTGGGTGGCTTACATCGACTACGGCGGCGATTTCACTTCTTACAGCGATGCAATCCGTGGCCGCTTCACTATCAGCCGTGACAACGCTAAGAACACTCTGTACCTGCAGATGAACTCTCTGCGCGCTGAAGACACTGCGATCTACTACTGCTCTCGTCGCCGCTACGATGCGATGGACTACTGGGGTCAGGGCACCCTG…
A24	nd	nd			N	N	56.34	0.803244	2	0	20	-21.4	-10.275	-11.9	-5.3	ATGAAACAGTCCACCATTGCTCTGGCGCTGCTGCCACTGCTGTTCACCCCTGTGACTAAGGCTGAAGTGCAATTGGTGGAGTCTGGCGGCGGTCTGGTGCAGCCGGGCGGTTCCCTGCGTCTGTCCTGTGCTGCGTCTGGCTTTACCTTCAGCAGCTACACCATGTCTTGGGTTCGTCAGGCCCCAGGTAAACGCCTGGAATGGGTCGCGTACATTGACTACGGCGGCGATTTCACCTCTTACTCCGATGCAATCCGCGGTCGTTTCACTATCTCCCGCGATAATGCAAAAAACACCCTGTACCTGCAAATGAATAGCCTGCGTGCTGAAGACACCGCGATCTATTACTGCTCTCGCCGCCGTTACGATGCGATGGACTACTGGGGTCAGGGCACCCTG…
A1_17_17	0.881217	66.2332	10.8655		Y	Y	54.32	0.797176	2	0	8	-23.7	-10.3868	-13	-7.1	ATGAAACAAAGCACCATTGCACTGGCACTGCTGCCGCTGCTGTTTACGCCGGTCACGAAGGCGGAGGTCCAATTGGTTGAAAGCGGCGGTGGTCTGGTCCAACCGGGTGGTAGCCTGCGCCTGAGCTGTGCCGCCTCTGGTTTTACCTTTTCCTCCTACACTATGAGCTGGGTGCGCCAGGCGCCGGGTAAACGTCTGGAATGGGTTGCGTACATCGATTACGGCGGCGACTTTACTTCTTACTCTGACGCGATTCGTGGCCGTTTCACCATTAGCCGTGACAACGCGAAAAATACTCTGTATCTGCAGATGAACAGCCTGCGTGCGGAAGACACCGCTATCTACTACTGTTCTCGTCGTCGTTACGATGCTATGGACTACTGGGGCCAGGGCACCCTG…
A17_1_17	0.859716	64.6171	11.1375		Y	Y	54.92	0.783918	2	0	2	-20.9	-11.2168	-10.89	-4.5	ATGAAACAGTCCACTATCGCTCTGGCTCTGCTGCCTCTGCTGTTTACCCCGGTTACCAAAGCGGAGGTTCAATTGGTTGAATCCGGCGGTGGTCTGGTTCAGCCAGGCGGTTCCCTGCGTCTGTCTTGTGCCGCAAGCGGCTTTACCTTCAGCAGCTATACCATGAGCTGGGTGCGCCAAGCACCGGGCAAACGTCTGGAATGGGTTGCGTACATTGATTATGGTGGTGACTTCACGAGCTACAGCGATGCCATCCGCGGTCGTTTCACGATCAGCCGTGATAATGCCAAGAACACGCTGTACCTGCAGATGAACAGCCTGCGTGCGGAAGATACCGCAATTTACTACTGCAGCCGCCGTCGTTACGACGCCATGGACTATTGGGGTCAGGGTACGCTG…
A17_17_1	2.02575	152.258	37.0259		Y	Y	55.63	0.783466	2	0	8	-23.7	-11.2814	-10.89	-4.5	ATGAAACAGTCCACTATCGCTCTGGCTCTGCTGCCTCTGCTGTTTACCCCGGTTACCAAAGCGGAGGTTCAATTGGTTGAATCCGGCGGTGGTCTGGTTCAGCCAGGCGGTTCCCTGCGTCTGTCTTGTGCCGCCTCTGGTTTTACCTTTTCCTCCTACACTATGAGCTGGGTGCGCCAGGCGCCGGGTAAACGTCTGGAATGGGTTGCGTACATCGATTACGGCGGCGACTTTACTTCTTACTCTGACGCGATTCGTGGCCGTTTCACCATTAGCCGTGACAACGCGAAAAATACTCTGTATCTGCAGATGAACAGCCTGCGTGCGGAAGACACCGCTATCTACTACTGTTCTCGTCGTCGTTACGATGCTATGGACTACTGGGGCCAGGGCACCCTG…
A17_1_1	2.34823	176.495	30.2584		Y	Y	56.82	0.747371	2	0	2	-20.9	-11.9306	-10.89	-4.5	ATGAAACAGTCCACTATCGCTCTGGCTCTGCTGCCTCTGCTGTTTACCCCGGTTACCAAAGCGGAGGTTCAATTGGTTGAATCCGGCGGTGGTCTGGTTCAGCCAGGCGGTTCCCTGCGTCTGTCTTGTGCCGCAAGCGGCTTTACCTTCAGCAGCTATACCATGAGCTGGGTGCGCCAAGCACCGGGCAAACGTCTGGAATGGGTTGCGTACATTGATTATGGTGGTGACTTCACGAGCTACAGCGATGCCATCCGCGGTCGTTTCACGATCAGCCGTGATAATGCCAAGAACACGCTGTACCTGCAGATGAACAGCCTGCGTGCGGAAGATACCGCAATTTACTACTGCAGCCGCCGTCGTTACGACGCCATGGACTATTGGGGTCAGGGTACGCTG…
A1_17_1	2.49323	187.393	32.3007		Y	Y	56.22	0.760011	2	0	8	-23.7	-11.154	-13	-7.1	ATGAAACAAAGCACCATTGCACTGGCACTGCTGCCGCTGCTGTTTACGCCGGTCACGAAGGCGGAGGTCCAATTGGTTGAAAGCGGCGGTGGTCTGGTCCAACCGGGTGGTAGCCTGCGCCTGAGCTGTGCCGCCTCTGGTTTTACCTTTTCCTCCTACACTATGAGCTGGGTGCGCCAGGCGCCGGGTAAACGTCTGGAATGGGTTGCGTACATCGATTACGGCGGCGACTTTACTTCTTACTCTGACGCGATTCGTGGCCGTTTCACCATTAGCCGTGACAACGCGAAAAATACTCTGTATCTGCAGATGAACAGCCTGCGTGCGGAAGACACCGCTATCTACTACTGTTCTCGTCGTCGTTACGATGCTATGGACTACTGGGGCCAGGGCACCCTG…
A1_1_17	0.759488	57.0839	4.12838		Y	Y	55.51	0.76045	2	0	2	-20.3	-11.0583	-13	-7.1	ATGAAACAAAGCACCATTGCACTGGCACTGCTGCCGCTGCTGTTTACGCCGGTCACGAAGGCGGAGGTCCAATTGGTTGAAAGCGGCGGTGGTCTGGTCCAACCGGGTGGTAGCCTGCGCCTGAGCTGTGCCGCAAGCGGCTTTACCTTCAGCAGCTATACCATGAGCTGGGTGCGCCAAGCACCGGGCAAACGTCTGGAATGGGTTGCGTACATTGATTATGGTGGTGACTTCACGAGCTACAGCGATGCCATCCGCGGTCGTTTCACGATCAGCCGTGATAATGCCAAGAACACGCTGTACCTGCAGATGAACAGCCTGCGTGCGGAAGATACCGCAATTTACTACTGCAGCCGCCGTCGTTACGACGCCATGGACTATTGGGGTCAGGGTACGCTG…
A1_11_11	1.82446	137.128	29.7974		Y	Y	57.41	0.715357	2	0	14	-22.1	-11.6807	-13	-7.1	ATGAAACAAAGCACCATTGCACTGGCACTGCTGCCGCTGCTGTTTACGCCGGTCACGAAGGCGGAGGTCCAATTGGTTGAAAGCGGCGGTGGTCTGGTCCAACCGGGTGGTAGCCTGCGCCTGAGCTGTGCGGCGAGCGGTTTCACCTTCAGCAGCTATACCATGAGCTGGGTTCGCCAAGCACCGGGTAAGCGTCTGGAGTGGGTTGCATACATCGACTATGGTGGCGATTTTACCAGCTACAGCGACGCAATCCGTGGCCGCTTCACCATCAGCCGTGATAATGCAAAAAACACCCTGTACCTGCAGATGAACAGCCTGCGTGCGGAGGATACGGCAATCTACTATTGCAGCCGTCGCCGCTACGATGCAATGGACTACTGGGGCCAAGGCACCCTG…
A11_11_1	nd	nd			N	N	58.48	0.744316	2	0	13	-22.1	-12.0382	-14.5	-7.3	ATGAAACAGAGCACGATCGCGCTGGCGCTGCTGCCGCTGCTGTTCACGCCGGTGACGAAGGCCGAAGTCCAATTGGTGGAAAGCGGCGGTGGTCTGGTTCAACCGGGTGGCAGCCTGCGCCTGAGCTGTGCGGCGAGCGGTTTCACCTTCAGCAGCTATACCATGAGCTGGGTTCGCCAAGCACCGGGTAAGCGTCTGGAGTGGGTTGCATACATCGACTATGGTGGCGATTTTACCAGCTACAGCGACGCAATCCGTGGCCGCTTCACCATCAGCCGTGATAATGCAAAAAACACCCTGTACCTGCAGATGAACAGCCTGCGTGCGGAGGATACGGCAATCTACTATTGCAGCCGTCGCCGCTACGATGCAATGGACTACTGGGGCCAAGGCACCCTG…
A11_1_11	nd	nd			N	N	57.53	0.716334	2	0	3	-21.7	-12.2077	-14.5	-7.3	ATGAAACAGAGCACGATCGCGCTGGCGCTGCTGCCGCTGCTGTTCACGCCGGTGACGAAGGCCGAAGTCCAATTGGTGGAAAGCGGCGGTGGTCTGGTTCAACCGGGTGGCAGCCTGCGCCTGAGCTGTGCCGCAAGCGGCTTTACCTTCAGCAGCTATACCATGAGCTGGGTGCGCCAAGCACCGGGCAAACGTCTGGAATGGGTTGCGTACATTGATTATGGTGGTGACTTCACGAGCTACAGCGATGCCATCCGCGGTCGTTTCACGATCAGCCGTGATAATGCCAAGAACACGCTGTACCTGCAGATGAACAGCCTGCGTGCGGAAGATACCGCAATTTACTACTGCAGCCGCCGTCGTTACGACGCCATGGACTATTGGGGTCAGGGTACGCTG…
A1_7	0.0975343	7.33078	2.21134		N	N	56.7	0.709803	2	0	13	-25.5	-11.6184	-13	-7.1	ATGAAACAAAGCACCATTGCACTGGCACTGCTGCCGCTGCTGTTTACGCCGGTCACGAAGGCGGAGGTCCAATTGGTGGAAAGCGGTGGCGGCCTGGTGCAACCGGGCGGTAGCCTGCGCCTGAGCTGTGCCGCGAGCGGTTTTACCTTTAGCAGCTATACGATGAGCTGGGTCCGCCAGGCACCGGGTAAACGTCTGGAATGGGTTGCGTATATCGACTACGGTGGCGATTTCACCAGCTATAGCGACGCGATCCGTGGCCGTTTTACCATTAGCCGCGATAATGCAAAAAACACCCTGTACCTGCAAATGAACAGCCTGCGTGCGGAGGACACCGCGATTTACTACTGCAGCCGCCGTCGTTACGATGCAATGGATTATTGGGGCCAGGGTACGCTG…
A1_8	nd	nd			N	N	51.72	0.498745	39	4	10	-20	-9.42516	-13	-7.1	ATGAAACAAAGCACCATTGCACTGGCACTGCTGCCGCTGCTGTTTACGCCGGTCACGAAGGCGGAGGTCCAATTGGTTGAATCAGGCGGTGGATTGGTCCAACCTGGTGGCAGTCTGCGACTGTCATGCGCGGCGTCAGGGTTTACCTTCAGCAGTTATACGATGTCATGGGTCCGACAAGCGCCGGGTAAACGTCTGGAATGGGTCGCGTATATCGACTACGGCGGTGACTTTACCTCATATTCTGATGCAATTCGTGGTCGGTTTACTATCAGCCGGGATAATGCCAAAAACACACTGTATCTCCAAATGAACTCCCTGCGCGCAGAAGATACGGCGATTTATTATTGCAGTCGTCGGCGTTATGATGCGATGGATTATTGGGGTCAGGGCACGCTA…
A1_14	3	225.483	31.8721		N	Y	56.58	0.734104	2	0	3	-28.2	-12.0822	-13	-7.1	ATGAAACAAAGCACCATTGCACTGGCACTGCTGCCGCTGCTGTTTACGCCGGTCACGAAGGCGGAGGTCCAATTGGTTGAAAGCGGTGGCGGCCTGGTTCAGCCGGGTGGTAGCCTGCGCCTGAGCTGCGCCGCGAGCGGCTTCACCTTCAGCAGCTACACCATGAGCTGGGTCCGTCAGGCACCGGGTAAACGCCTGGAATGGGTGGCCTATATCGACTATGGCGGTGATTTTACCAGCTATAGCGATGCGATTCGTGGCCGTTTCACCATTAGCCGCGACAATGCCAAAAACACGCTGTACCTGCAAATGAATAGCCTGCGTGCAGAAGATACCGCAATTTATTATTGCAGCCGTCGTCGCTATGATGCGATGGATTACTGGGGTCAAGGTACGCTG…
A1_16	0.188168	14.1429	8.27633		N	N	54.56	0.724305	13	0	10	-19.2	-10.5988	-13	-7.1	ATGAAACAAAGCACCATTGCACTGGCACTGCTGCCGCTGCTGTTTACGCCGGTCACGAAGGCGGAGGTCCAATTGGTAGAATCTGGCGGTGGTCTTGTGCAACCGGGCGGTAGCCTGCGTCTGTCGTGCGCAGCTTCTGGTTTTACCTTCTCCTCTTATACCATGAGCTGGGTGCGTCAGGCCCCGGGCAAACGTTTGGAATGGGTGGCATACATCGATTACGGTGGCGATTTCACTTCCTACTCCGACGCGATCCGCGGTCGTTTCACCATTAGCCGTGACAATGCGAAAAACACTCTGTACCTGCAGATGAACTCACTGCGCGCGGAAGACACTGCAATCTACTACTGCTCTCGTCGTCGCTATGATGCGATGGACTACTGGGGTCAGGGTACTCTG…
A1_19	1.10397	82.9757	22.3624		N	Y	56.22	0.787587	2	0	9	-22.6	-11.0324	-13	-7.1	ATGAAACAAAGCACCATTGCACTGGCACTGCTGCCGCTGCTGTTTACGCCGGTCACGAAGGCGGAGGTCCAATTGGTGGAATCCGGTGGCGGCCTGGTCCAGCCGGGTGGTTCCCTGCGTCTGAGCTGTGCAGCATCCGGCTTCACGTTCTCCTCTTACACCATGTCCTGGGTCCGCCAGGCTCCGGGTAAACGCCTGGAATGGGTTGCGTACATCGACTACGGTGGTGACTTCACCTCCTATTCTGATGCTATCCGTGGCCGCTTCACCATCAGCCGCGACAACGCGAAAAACACTCTGTATCTGCAGATGAACTCTCTGCGTGCAGAGGATACCGCCATTTATTACTGCTCTCGTCGTCGTTACGACGCTATGGACTATTGGGGTCAGGGCACTCTG…
A1_24	0.551628	41.461	8.73861		N	Y	56.58	0.791578	2	0	20	-21.4	-10.4537	-13	-7.1	ATGAAACAAAGCACCATTGCACTGGCACTGCTGCCGCTGCTGTTTACGCCGGTCACGAAGGCGGAGGTCCAATTGGTGGAGTCTGGCGGCGGTCTGGTGCAGCCGGGCGGTTCCCTGCGTCTGTCCTGTGCTGCGTCTGGCTTTACCTTCAGCAGCTACACCATGTCTTGGGTTCGTCAGGCCCCAGGTAAACGCCTGGAATGGGTCGCGTACATTGACTACGGCGGCGATTTCACCTCTTACTCCGATGCAATCCGCGGTCGTTTCACTATCTCCCGCGATAATGCAAAAAACACCCTGTACCTGCAAATGAATAGCCTGCGTGCTGAAGACACCGCGATCTATTACTGCTCTCGCCGCCGTTACGATGCGATGGACTACTGGGGTCAGGGCACCCTG…
A_FreqA	1.89296	142.277	31.3642		N	N	56.1	0.663496	13	0	1	-20.9	-11.5616	-9.9	-3.3	ATGAAACAGTCTACGATTGCACTGGCCTTGTTACCGCTGCTGTTTACCCCTGTGACCAAGGCGGAAGTCCAGCTGGTGGAGTCCGGTGGTGGTTTGGTGCAGCCTGGCGGTTCGCTGCGTCTGAGCTGCGCAGCCTCCGGTTTTACCTTTAGCTCCTACACCATGAGCTGGGTGCGCCAAGCGCCAGGTAAACGTCTTGAGTGGGTCGCGTACATTGACTATGGTGGTGATTTCACCAGCTACAGCGACGCAATCCGTGGTCGCTTCACCATTAGCCGTGACAACGCGAAGAATACCTTGTACCTGCAAATGAACAGCTTGCGCGCAGAGGACACGGCGATTTATTACTGTTCGCGTCGCCGCTATGACGCTATGGATTACTGGGGTCAAGGCACCCTG…
A_FreqB	1.79155	134.655	6.11098		N	N	55.87	0.69075	9	0	1	-26.1	-10.8389	-13	-7.1	ATGAAACAAAGCACCATTGCACTGGCACTGCTGCCGCTGCTGTTTACCCCGGTCACGAAAGCCGAAGTGCAACTGGTCGAAAGCGGCGGTGGTTTGGTGCAGCCGGGTGGCAGCCTGCGCCTGTCCTGTGCGGCGTCTGGCTTTACCTTCAGCAGCTACACCATGAGCTGGGTTCGCCAAGCGCCTGGTAAGCGTCTGGAATGGGTCGCCTACATTGATTACGGTGGCGACTTCACGAGCTATAGCGATGCAATTCGTGGCCGTTTCACCATCAGCCGCGATAATGCGAAAAACACCTTGTACCTGCAGATGAACAGCCTGCGTGCAGAGGACACCGCGATCTACTATTGCTCGCGTCGCCGTTATGATGCGATGGATTACTGGGGTCAAGGTACTCTG…
A_HiCAI	0.277034	20.8222	1.28463		N	N	54.68	0.883125	0	0	4	-20.7	-10.0719	-13	-7.1	ATGAAACAAAGCACCATTGCACTGGCACTGCTGCCGCTGCTGTTTACTCCGGTTACCAAAGCTGAAGTGCAGCTGGTTGAATCCGGTGGCGGTCTGGTTCAGCCGGGTGGTTCCCTGCGTCTGTCCTGCGCGGCTTCTGGTTTTACTTTTTCCTCTTACACCATGTCTTGGGTTCGTCAGGCTCCGGGCAAACGTCTGGAATGGGTGGCGTACATCGATTACGGCGGTGACTTCACCTCCTACTCCGATGCGATCCGTGGCCGCTTTACTATCTCTCGCGACAACGCTAAAAACACCCTGTACCTGCAGATGAACTCTCTGCGTGCGGAAGACACTGCTATCTATTATTGCTCCCGTCGCCGTTACGACGCTATGGATTATTGGGGCCAGGGTACTCTG…
P1	0.288536	6.51881	2.07171	Y		Y	47.53	0.814115	0	0	7	-23.4	-9.32174	-11.9	-5.5	ATGAAGCACATGCCGCGCAAGATGTACAGCTGCGACTTCGAGACGACCACCAAAGTGGAAGATTGCCGCGTGTGGGCGTACGGCTACATGAATATCGAGGATCATAGCGAGTACAAAATCGGTAATAGCCTGGACGAATTTATGGCGTGGGTTCTGAAAGTGCAGGCGGATCTGTACTTTCACAACCTGAAATTCGATGGTGCGTTCATTATTAATTGGCTGGAACGCAATGGCTTCAAATGGAGCGCGGACGGTCTGCCGAACACCTATAATACCATTATCAGCCGTATGGGCCAGTGGTACATGATCGATATCTGTCTGGGTTACAAAGGTAAACGTAAAATCCATACCGTGATCTATGACAGCCTGAAAAAACTGCCGTTTCCGGTGAAAAAAATT…
P2	nd	nd		Y		Y	44.46	0.579146	51	12	12	-19.2	-7.89897	-14.71	-8.4	ATGAAGCACATGCCGCGGAAGATGTACTCCTGCGACTTCGAGACGACCACTAAAGTTGAGGATTGCCGGGTGTGGGCATACGGTTATATGAACATCGAAGATCACTCTGAATACAAGATCGGTAACAGTTTAGATGAGTTCATGGCGTGGGTTCTGAAGGTGCAGGCTGATTTATACTTCCATAATTTGAAATTTGACGGCGCTTTTATTATCAATTGGCTGGAACGTAATGGATTTAAATGGTCAGCCGATGGCCTGCCGAATACCTATAACACCATCATTAGCCGTATGGGCCAATGGTATATGATCGATATTTGCCTGGGTTATAAAGGCAAACGCAAAATACATACTGTAATCTACGATAGCCTGAAAAAACTTCCGTTCCCCGTCAAAAAAATT…
P3	nd	nd		Y		Y	46.14	0.948254	0	0	6	-21.5	-8.10597	-6.44	-2	ATGAAACATATGCCGCGTAAAATGTATTCTTGTGATTTTGAAACTACCACCAAAGTTGAAGACTGCCGTGTTTGGGCGTACGGCTATATGAACATTGAAGACCACTCTGAATACAAAATCGGTAACTCTCTGGACGAATTTATGGCGTGGGTTCTGAAAGTGCAGGCGGATCTGTACTTTCACAACCTGAAATTCGATGGCGCGTTCATTATCAACTGGCTGGAACGTAACGGTTTCAAATGGTCTGCGGACGGTCTGCCGAACACCTACAACACCATCATTTCTCGCATGGGTCAGTGGTACATGATCGATATTTGCCTGGGCTATAAAGGTAAACGTAAAATCCACACCGTTATTTACGATTCTCTGAAAAAACTGCCGTTCCCGGTTAAAAAAATC…
P4	0.41477	9.37079	1.60098	Y		Y	47.42	0.807955	0	0	7	-20.7	-9.16387	-6.1	-3.5	ATGAAACATATGCCGCGTAAAATGTATAGCTGTGATTTTGAAACCACCACCAAAGTGGAAGATTGCCGCGTGTGGGCGTACGGTTATATGAATATTGAAGACCACAGCGAATATAAAATTGGCAATAGCCTGGATGAGTTTATGGCGTGGGTGCTGAAAGTGCAAGCGGACCTGTATTTCCATAATCTGAAATTTGATGGCGCGTTCATCATTAACTGGCTGGAACGTAACGGTTTTAAATGGAGCGCGGACGGCCTGCCGAACACCTATAATACCATTATTAGCCGTATGGGCCAATGGTATATGATCGACATCTGCCTGGGCTATAAAGGCAAACGCAAAATTCACACCGTGATCTACGATAGCCTGAAAAAACTGCCGTTCCCGGTGAAAAAAATC…
P5	0.236303	5.33873	0.710252	Y		Y	45.44	0.756459	18	0	0	-23.3	-8.27266	-6.5	-3.7	ATGAAACATATGCCACGTAAAATGTATAGTTGTGATTTTGAAACTACCACCAAAGTAGAAGACTGCCGTGTATGGGCGTATGGTTACATGAACATTGAGGATCACAGCGAATATAAAATCGGTAACTCTCTGGATGAATTTATGGCATGGGTTCTGAAAGTGCAGGCAGATCTGTACTTTCACAACCTGAAGTTCGATGGTGCATTCATCATCAACTGGCTGGAACGTAACGGTTTCAAATGGTCAGCTGATGGCCTGCCAAACACCTACAACACTATTATTTCCCGTATGGGTCAGTGGTACATGATTGATATCTGCCTTGGTTACAAGGGTAAACGCAAGATTCACACCGTAATCTATGACAGCCTGAAGAAACTGCCGTTCCCGGTAAAAAAAATC…
P6	1.49015	33.6666	4.29433	Y		Y	46.2	0.737846	20	0	9	-20.8	-8.19374	-12.8	-8.8	ATGAAGCACATGCCGCGCAAGATGTACTCGTGCGACTTCGAAACCACTACGAAAGTTGAAGACTGCCGTGTTTGGGCCTACGGCTACATGAACATTGAAGACCACTCTGAGTACAAAATCGGCAACTCTCTTGATGAGTTCATGGCTTGGGTGCTCAAAGTACAAGCTGACCTCTATTTCCATAACCTGAAGTTTGATGGCGCGTTCATCATTAACTGGCTGGAGCGTAACGGTTTTAAATGGTCAGCTGATGGCCTCCCGAACACTTACAATACTATTATCTCCCGTATGGGCCAGTGGTACATGATCGACATTTGTCTGGGCTACAAGGGTAAACGTAAAATCCATACCGTAATTTATGATTCTCTGAAAAAACTGCCGTTTCCGGTAAAAAAAATC…
P7	0.577929	13.057	1.81517	Y		Y	43.71	0.547343	58	5	0	-21	-8.37675	-6.5	-3.7	ATGAAACATATGCCACGTAAAATGTATAGTTGTGATTTTGAAACTACCACGAAAGTGGAAGACTGCCGGGTGTGGGCCTACGGCTATATGAATATTGAAGACCATAGCGAATATAAGATTGGCAATAGCCTGGATGAGTTCATGGCCTGGGTTCTGAAAGTGCAGGCAGACTTGTACTTTCACAACCTTAAATTTGACGGCGCTTTTATTATTAACTGGCTGGAACGCAATGGATTTAAATGGAGTGCCGATGGTCTGCCGAACACCTACAACACCATAATTTCACGCATGGGTCAATGGTACATGATCGATATCTGTCTGGGCTATAAGGGTAAACGCAAAATTCATACGGTGATTTACGATTCTCTGAAAAAGTTACCGTTTCCCGTTAAAAAAATT…
P8	0.708459	16.006	5.58795	Y		Y	45.68	0.894228	0	0	1	-16.49	-7.77635	-10.9	-4.6	ATGAAACACATGCCGCGCAAAATGTACTCCTGCGACTTCGAGACTACCACCAAAGTTGAAGATTGCCGTGTTTGGGCGTACGGTTATATGAACATCGAAGACCACTCTGAATACAAAATCGGTAACTCCCTGGATGAATTTATGGCGTGGGTGCTGAAAGTTCAGGCGGATCTGTATTTCCACAACCTGAAATTCGACGGCGCTTTCATCATCAACTGGCTGGAACGCAACGGCTTCAAATGGTCTGCTGACGGTCTGCCGAACACCTACAACACCATTATCTCTCGTATGGGCCAGTGGTATATGATCGATATCTGTCTGGGCTACAAAGGCAAACGTAAAATCCATACTGTGATTTATGATTCTCTGAAAAAACTGCCGTTCCCGGTTAAAAAAATT…
P9	0.981795	22.1814	2.39364	Y		Y	45.97	0.799406	0	0	0	-20.2	-8.44112	-9.5	-6	ATGAAACACATGCCACGCAAAATGTACTCTTGCGATTTCGAAACCACCACTAAGGTTGAAGACTGCCGTGTGTGGGCGTACGGCTATATGAATATCGAAGACCACAGCGAATATAAAATTGGCAACAGCCTGGATGAGTTCATGGCGTGGGTACTGAAAGTTCAAGCTGACCTGTATTTCCACAACCTGAAGTTTGACGGTGCTTTCATCATCAACTGGCTGGAGCGTAACGGTTTCAAGTGGTCTGCTGATGGCCTGCCGAACACCTACAACACCATCATCTCTCGTATGGGCCAGTGGTACATGATCGACATCTGTCTGGGTTATAAAGGCAAACGCAAAATTCACACCGTAATCTACGATAGCCTGAAAAAACTGCCGTTCCCGGTTAAAAAAATC…
P10	0.875803	19.7868	0.777197	Y		Y	46.95	0.809068	0	0	0	-19.2	-8.37433	-12.1	-3.9	ATGAAGCATATGCCGCGTAAGATGTATTCCTGTGACTTTGAGACTACCACCAAGGTGGAAGACTGTCGTGTGTGGGCATACGGTTACATGAACATCGAAGACCACTCCGAATACAAGATTGGTAACAGCCTGGACGAATTTATGGCTTGGGTGCTGAAAGTTCAGGCCGACCTGTACTTCCACAACCTGAAATTCGATGGCGCATTCATCATTAACTGGCTGGAACGTAACGGTTTTAAGTGGTCTGCGGACGGCCTGCCAAATACCTATAACACCATCATCTCTCGCATGGGTCAGTGGTACATGATCGATATCTGCCTGGGTTACAAAGGTAAACGTAAAATTCACACGGTTATCTATGATTCTCTGAAAAAACTGCCGTTCCCGGTGAAAAAAATC…
P11	nd	nd		Y		Y	45.85	0.796782	0	0	0	-18.5	-7.98066	-9.3	-6	ATGAAACACATGCCACGCAAAATGTATTCTTGCGATTTTGAGACGACCACGAAAGTTGAAGATTGCCGTGTGTGGGCGTACGGCTACATGAATATCGAAGACCACAGCGAGTATAAGATTGGTAATTCTCTGGACGAATTTATGGCCTGGGTTCTGAAAGTTCAGGCAGACCTGTACTTCCACAACCTGAAATTCGATGGTGCGTTTATCATCAACTGGCTGGAGCGCAACGGTTTTAAATGGTCTGCGGATGGTCTGCCAAACACCTATAACACTATCATCAGCCGCATGGGTCAGTGGTACATGATTGACATCTGCCTGGGTTACAAGGGTAAACGCAAGATCCACACTGTTATTTATGATTCCCTGAAAAAGCTGCCGTTTCCGGTTAAAAAAATT…
P12	1.0717	24.2127	1.38939	Y		Y	45.85	0.910271	0	0	6	-23.7	-7.95201	-11.4	-3.32	ATGAAACACATGCCGCGTAAAATGTACTCCTGCGATTTCGAAACTACCACCAAAGTTGAAGATTGTCGTGTTTGGGCTTACGGTTACATGAACATCGAAGACCACTCTGAATACAAAATCGGTAACTCTCTGGACGAATTTATGGCGTGGGTGCTGAAAGTTCAGGCGGATCTGTATTTCCACAACCTGAAATTTGATGGCGCGTTCATTATCAACTGGCTGGAACGCAACGGCTTCAAATGGTCCGCGGACGGTCTGCCGAACACCTACAACACTATTATCTCTCGTATGGGCCAGTGGTATATGATCGACATCTGCCTGGGTTACAAAGGCAAACGTAAAATCCACACCGTGATCTATGATTCTCTGAAAAAACTGCCGTTCCCGGTTAAAAAAATT…
P13	0.297553	6.72252	0.79776	Y		Y	45.44	0.720454	25	0	4	-22.2	-7.81058	-15.9	-8.2	ATGAAGCACATGCCGCGTAAGATGTATTCATGTGACTTCGAAACAACCACTAAGGTTGAAGACTGCCGCGTATGGGCATACGGTTATATGAACATCGAAGATCACTCTGAATATAAAATCGGTAACTCTCTGGACGAGTTCATGGCGTGGGTTCTGAAAGTTCAGGCGGATCTCTATTTCCACAACCTGAAATTCGATGGCGCATTCATTATCAACTGGTTGGAACGTAACGGTTTTAAATGGAGCGCCGATGGCCTGCCTAATACTTACAACACTATCATCTCCCGTATGGGTCAGTGGTACATGATCGATATCTGCCTGGGATACAAAGGTAAGCGCAAAATCCACACCGTTATTTACGATAGCCTGAAAAAACTGCCGTTTCCTGTAAAAAAGATT…
P15	0.261486	5.90767	1.18673	Y		Y	43.18	0.895996	0	0	10	-20.9	-7.60918	-6.04	-2	ATGAAACATATGCCGCGTAAAATGTATTCTTGTGACTTTGAAACCACTACTAAAGTGGAAGACTGTCGTGTTTGGGCGTATGGTTATATGAACATCGAAGATCACTCTGAATACAAAATCGGTAACTCCCTGGATGAATTTATGGCGTGGGTGCTGAAAGTTCAGGCTGATCTGTATTTCCATAACCTGAAATTTGACGGTGCTTTTATCATTAACTGGCTGGAACGTAACGGTTTTAAATGGTCTGCTGACGGTCTGCCGAACACCTATAACACCATCATCTCTCGCATGGGTCAGTGGTACATGATTGATATCTGTCTGGGCTACAAAGGTAAACGTAAAATCCATACCGTGATCTATGACTCCCTGAAAAAACTGCCGTTTCCGGTTAAAAAAATC…
P16	nd	nd		Y		Y	40.46	0.498129	81	0	9	-18.7	-7.55433	-10.7	-7	ATGAAGCATATGCCGCGTAAGATGTATAGTTGTGACTTTGAGACAACTACTAAAGTGGAAGACTGTCGTGTATGGGCGTATGGTTATATGAATATCGAAGATCACAGTGAGTACAAAATCGGTAATAGCCTGGATGAGTTTATGGCGTGGGTGTTGAAGGTACAAGCTGATCTGTATTTCCATAACCTCAAATTTGACGGAGCTTTTATCATTAACTGGTTGGAACGTAATGGTTTTAAGTGGTCGGCTGACGGATTGCCAAACACATATAATACGATCATCTCTCGCATGGGACAATGGTACATGATTGATATCTGTTTAGGCTACAAAGGGAAACGTAAGATCCATACAGTGATCTATGACAGCTTAAAGAAACTGCCGTTTCCTGTTAAGAAGATC…
P17	nd	nd		Y		Y	37.97	0.347484	131	48	9	-19.4	-6.78944	-9.1	-3.7	ATGAAGCATATGCCGAGAAAGATGTATAGTTGTGACTTTGAGACAACTACTAAAGTGGAAGACTGTAGGGTATGGGCGTATGGTTATATGAATATAGAAGATCACAGTGAGTACAAAATAGGTAATAGCCTGGATGAGTTTATGGCGTGGGTGTTGAAGGTACAAGCTGATCTATATTTCCATAACCTCAAATTTGACGGAGCTTTTATCATTAACTGGTTGGAACGTAATGGTTTTAAGTGGTCGGCTGACGGATTGCCAAACACATATAATACGATCATATCTCGCATGGGTCAATGGTACATGATTGATATATGTTTAGGCTACAAAGGGAAACGTAAGATACATACAGTGATATATGACAGCTTAAAGAAACTACCGTTTCCTGTTAAGAAGATA…
P18	1.21662	27.4867	2.43931	Y		Y	50.72	0.793971	0	0	4	-21.9	-9.73816	-11.4	-3.32	ATGAAACACATGCCGCGTAAAATGTACTCCTGCGATTTCGAAACCACCACCAAGGTTGAGGATTGCCGTGTTTGGGCTTACGGCTACATGAACATCGAGGACCATTCCGAATATAAGATCGGCAACTCTCTGGACGAATTTATGGCTTGGGTTCTGAAAGTTCAGGCGGACCTGTACTTTCACAACCTGAAGTTCGATGGTGCGTTCATTATCAACTGGCTGGAGCGCAACGGCTTCAAATGGAGCGCGGATGGTCTGCCGAACACCTACAACACCATTATCAGCCGTATGGGTCAGTGGTATATGATCGACATCTGCCTGGGTTATAAGGGTAAGCGCAAAATCCACACCGTTATCTACGATTCTCTGAAAAAGCTGCCGTTCCCGGTGAAAAAAATC…
P19	3	67.7781	19.8183	Y		Y	48.23	0.649761	33	0	4	-18.9	-8.89011	-9.31	-6	ATGAAACATATGCCACGCAAAATGTACTCGTGCGACTTCGAAACCACCACCAAGGTTGAGGATTGCCGTGTTTGGGCTTACGGCTACATGAACATCGAGGACCATTCCGAATATAAGATCGGCAACTCTTTAGACGAATTTATGGCTTGGGTTCTCAAAGTTCAGGCGGACTTGTACTTTCACAATTTGAAGTTCGATGGTGCGTTCATTATCAATTGGCTCGAGCGCAACGGCTTCAAATGGAGCGCGGATGGCCTCCCGAATACCTACAACACCATTATCAGCCGTATGGGTCAGTGGTATATGATCGACATCTGCCTGGGTTATAAGGGTAAGCGCAAAATCCACACCGTTATCTACGATTCTCTGAAAAAGTTGCCATTCCCGGTGAAAAAAATC…
P20	2.45456	55.4552	12.9341	Y		Y	47.24	0.548205	64	8	0	-18.7	-8.97467	-9.9	-5.1	ATGAAACACATGCCACGCAAAATGTACTCGTGCGATTTCGAAACCACCACCAAGGTTGAGGATTGCAGGGTGTGGGCCTACGGCTACATGAACATTGAGGACCATTCGGAATATAAGATTGGCAACTCGTTAGACGAATTTATGGCCTGGGTTCTTAAAGTGCAGGCGGACTTGTACTTTCACAATTTGAAGTTCGATGGCGCTTTCATTATCAATTGGCTTGAGAGAAACGGCTTCAAATGGAGTGCCGATGGCCTTCCGAATACCTACAACACCATTATTAGCAGAATGGGCCAGTGGTATATGATCGACATTTGCCTGGGTTATAAGGGCAAGAGAAAAATTCACACCGTTATTTACGATTCGCTGAAAAAGTTGCCATTCCCGGTGAAAAAAATT…
P21	0.767325	17.336	2.17391	Y		Y	46.66	0.822467	0	0	4	-18.9	-8.5786	-7.3	-2.9	ATGAAACACATGCCACGTAAAATGTATAGCTGCGACTTCGAGACTACCACTAAAGTGGAAGACTGTCGCGTGTGGGCTTATGGCTACATGAATATCGAGGATCACTCTGAGTACAAAATCGGCAATTCTCTGGACGAATTTATGGCATGGGTTCTGAAGGTTCAAGCTGATCTGTATTTCCACAACCTGAAATTCGATGGTGCTTTTATCATTAACTGGCTGGAACGCAACGGCTTCAAATGGTCTGCGGACGGTCTGCCGAACACCTACAACACCATCATTAGCCGTATGGGTCAGTGGTACATGATCGATATTTGCCTGGGCTACAAAGGTAAACGCAAAATCCACACCGTGATTTACGACTCTCTGAAAAAGCTGCCGTTTCCGGTTAAAAAGATT…
Pwt	nd	nd		Y		Y	38.08	0.349481	132	48	9	-19.4	-6.75809	-9.1	-3.7	ATGAAGCATATGCCGAGAAAGATGTATAGTTGTGACTTTGAGACAACTACTAAAGTGGAAGACTGTAGGGTATGGGCGTATGGTTATATGAATATAGAAGATCACAGTGAGTACAAAATAGGTAATAGCCTGGATGAGTTTATGGCGTGGGTGTTGAAGGTACAAGCTGATCTATATTTCCATAACCTCAAATTTGACGGAGCTTTTATCATTAACTGGTTGGAACGTAATGGTTTTAAGTGGTCGGCTGACGGATTGCCAAACACATATAATACGATCATATCTCGCATGGGACAATGGTACATGATTGATATATGTTTAGGCTACAAAGGGAAACGTAAGATACATACAGTGATATATGACAGCTTAAAGAAACTACCGTTTCCTGTTAAGAAGATA…
P19_20_19	2.05324	46.3883	4.99065	Y		Y	47.24	0.589722	49	5	1	-18.9	-8.91429	-9.31	-6	ATGAAACATATGCCACGCAAAATGTACTCGTGCGACTTCGAAACCACCACCAAGGTTGAGGATTGCCGTGTTTGGGCCTACGGCTACATGAACATTGAGGACCATTCGGAATATAAGATTGGCAACTCGTTAGACGAATTTATGGCCTGGGTTCTTAAAGTGCAGGCGGACTTGTACTTTCACAATTTGAAGTTCGATGGCGCTTTCATTATCAATTGGCTTGAGAGAAACGGCTTCAAATGGAGTGCCGATGGCCTTCCGAATACCTACAACACCATTATTAGCAGAATGGGCCAGTGGTATATGATCGACATTTGCCTGGGTTATAAGGGCAAGAGAAAAATTCACACCGTTATTTACGATTCGCTGAAAAAGTTGCCATTCCCGGTGAAAAAAATT…
P15_15_19	0.65745	14.8536	4.84482	Y		Y	45.33	0.778494	12	0	5	-20.9	-8.28131	-6.04	-2	ATGAAACATATGCCGCGTAAAATGTATTCTTGTGACTTTGAAACCACTACTAAAGTGGAAGACTGTCGTGTTTGGGCGTATGGTTATATGAACATCGAAGATCACTCTGAATACAAAATCGGTAACTCCCTGGATGAATTTATGGCGTGGGTGCTGAAAGTTCAGGCTGATCTGTATTTCCATAACCTGAAATTTGACGGTGCTTTTATCATTAACTGGCTGGAACGTAACGGTTTTAAATGGTCTGCTGACGGTCTGCCGAACACCTATAACACCATCATCTCTCGCATGGGTCAGTGGTACATGATTGATATCTGTCTGGGCTACAAAGGTAAACGTAAAATCCATACCGTGATCTATGACTCCCTGAAAAAACTGCCGTTTCCGGTTAAAAAAATC…
P15_19_15	0.279261	6.30927	0.876226	Y		Y	45.44	0.775751	15	0	9	-18.7	-8.01352	-6.04	-2	ATGAAACATATGCCGCGTAAAATGTATTCTTGTGACTTTGAAACCACTACTAAAGTGGAAGACTGTCGTGTTTGGGCGTATGGTTATATGAACATCGAAGATCACTCTGAATACAAAATCGGTAACTCCCTGGATGAATTTATGGCGTGGGTGCTGAAAGTTCAGGCTGATCTGTATTTCCATAACCTGAAATTTGACGGTGCTTTTATCATTAACTGGCTGGAACGCAACGGCTTCAAATGGAGCGCGGATGGCCTCCCGAATACCTACAACACCATTATCAGCCGTATGGGTCAGTGGTATATGATCGACATCTGCCTGGGTTATAAGGGTAAGCGCAAAATCCACACCGTTATCTACGATTCTCTGAAAAAGTTGCCATTCCCGGTGAAAAAAATC…
P19_15_15	0.384757	8.69271	1.02706	Y		Y	43.82	0.86375	6	0	10	-20.9	-7.79463	-9.31	-6	ATGAAACATATGCCACGCAAAATGTACTCGTGCGACTTCGAAACCACCACCAAGGTTGAGGATTGCCGTGTTTGGGCTTACGGCTACATGAACATCGAGGACCATTCCGAATATAAGATCGGCAACTCTTTAGACGAATTTATGGCTTGGGTTCTCAAAGTTCAGGCGGACTTGTACTTTCACAATTTGAAGTTCGATGGTGCGTTCATTATCAATTGGCTCGAGCGTAACGGTTTTAAATGGTCTGCTGACGGTCTGCCGAACACCTATAACACCATCATCTCTCGCATGGGTCAGTGGTACATGATTGATATCTGTCTGGGCTACAAAGGTAAACGTAAAATCCATACCGTGATCTATGACTCCCTGAAAAAACTGCCGTTTCCGGTTAAAAAAATC…
P15_19_19	1.30485	29.4801	2.06206	Y		Y	47.59	0.674019	27	0	4	-18.9	-8.68416	-6.04	-2	ATGAAACATATGCCGCGTAAAATGTATTCTTGTGACTTTGAAACCACTACTAAAGTGGAAGACTGTCGTGTTTGGGCGTATGGTTATATGAACATCGAAGATCACTCTGAATACAAAATCGGTAACTCCCTGGATGAATTTATGGCGTGGGTGCTGAAAGTTCAGGCTGATCTGTATTTCCATAACCTGAAATTTGACGGTGCTTTTATCATTAACTGGCTGGAACGCAACGGCTTCAAATGGAGCGCGGATGGCCTCCCGAATACCTACAACACCATTATCAGCCGTATGGGTCAGTGGTATATGATCGACATCTGCCTGGGTTATAAGGGTAAGCGCAAAATCCACACCGTTATCTACGATTCTCTGAAAAAGTTGCCATTCCCGGTGAAAAAAATC…
P19_15_19	1.36127	30.7548	3.05486	Y		Y	45.97	0.750477	18	0	5	-20.9	-8.46676	-9.31	-6	ATGAAACATATGCCACGCAAAATGTACTCGTGCGACTTCGAAACCACCACCAAGGTTGAGGATTGCCGTGTTTGGGCTTACGGCTACATGAACATCGAGGACCATTCCGAATATAAGATCGGCAACTCTTTAGACGAATTTATGGCTTGGGTTCTCAAAGTTCAGGCGGACTTGTACTTTCACAATTTGAAGTTCGATGGTGCGTTCATTATCAATTGGCTCGAGCGTAACGGTTTTAAATGGTCTGCTGACGGTCTGCCGAACACCTATAACACCATCATCTCTCGCATGGGTCAGTGGTACATGATTGATATCTGTCTGGGCTACAAAGGTAAACGTAAAATCCATACCGTGATCTATGACTCCCTGAAAAAACTGCCGTTTCCGGTTAAAAAAATC…
P19_19_15	0.962344	21.742	2.44596	Y		Y	46.08	0.747833	21	0	9	-18.7	-8.21947	-9.31	-6	ATGAAACATATGCCACGCAAAATGTACTCGTGCGACTTCGAAACCACCACCAAGGTTGAGGATTGCCGTGTTTGGGCTTACGGCTACATGAACATCGAGGACCATTCCGAATATAAGATCGGCAACTCTTTAGACGAATTTATGGCTTGGGTTCTCAAAGTTCAGGCGGACTTGTACTTTCACAATTTGAAGTTCGATGGTGCGTTCATTATCAATTGGCTCGAGCGCAACGGCTTCAAATGGAGCGCGGATGGCCTCCCGAATACCTACAACACCATTATCAGCCGTATGGGTCAGTGGTATATGATCGACATCTGCCTGGGTTATAAGGGTAAGCGCAAAATCCACACCGTTATCTACGATTCTCTGAAAAAGTTGCCATTCCCGGTGAAAAAAATC…
P_FreqB	1.8085	40.859	3.69903	N		N	49.1	0.693281	8	0	3	-21.2	-9.78014	-9.5	-7.2	ATGAAGCACATGCCGCGCAAAATGTACTCGTGCGATTTTGAAACCACGACGAAGGTTGAGGACTGTCGTGTGTGGGCCTACGGCTATATGAACATCGAAGATCATAGCGAATACAAGATTGGCAACTCCCTGGATGAGTTTATGGCGTGGGTTCTGAAGGTTCAAGCGGATTTGTACTTTCACAATCTGAAGTTCGACGGTGCCTTCATCATCAATTGGCTGGAGCGCAATGGCTTCAAATGGAGCGCGGATGGTCTGCCGAATACCTACAACACCATTATCTCCCGCATGGGTCAATGGTATATGATCGACATTTGTCTGGGCTACAAAGGCAAGCGTAAGATTCACACTGTTATCTACGATTCCCTGAAGAAGTTGCCGTTCCCGGTCAAGAAGATC…
P20_20_7	1.9345	43.7057	2.80663	Y		Y	45.27	0.536637	70	8	0	-19.2	-8.52864	-9.9	-5.1	ATGAAACACATGCCACGCAAAATGTACTCGTGCGATTTCGAAACCACCACCAAGGTTGAGGATTGCAGGGTGTGGGCCTACGGCTACATGAACATTGAGGACCATTCGGAATATAAGATTGGCAACTCGTTAGACGAATTTATGGCCTGGGTTCTTAAAGTGCAGGCGGACTTGTACTTTCACAATTTGAAGTTCGATGGCGCTTTCATTATCAATTGGCTTGAGAGAAACGGCTTCAAATGGAGTGCCGATGGCCTTCCGAATACCTACAACACCATTATTAGCAGAATGGGCCAGTGGTATATGATCGACATTTGCCTGGGTTATAAGGGCAAGAGAAAAATTCACACCGTTATTTACGATTCGCTGAAAAAGTTGCCATTCCCGGTGAAAAAAATT…
P20_7_20	0.796936	18.0049	1.45594	Y		Y	46.02	0.565033	52	6	0	-21	-8.7208	-9.9	-5.1	ATGAAACACATGCCACGCAAAATGTACTCGTGCGATTTCGAAACCACCACCAAGGTTGAGGATTGCAGGGTGTGGGCCTACGGCTATATGAATATTGAAGACCATAGCGAATATAAGATTGGCAATAGCCTGGATGAGTTCATGGCCTGGGTTCTGAAAGTGCAGGCAGACTTGTACTTTCACAACCTTAAATTTGACGGCGCTTTTATTATTAACTGGCTGGAACGCAATGGATTTAAATGGAGTGCCGATGGTCTGCCGAACACCTACAACACCATAATTTCACGCATGGGTCAATGGTACATGATCGATATCTGTCTGGGCTATAAGGGTAAACGCAAAATTCATACGGTGATTTACGATTCTCTGAAAAAGTTACCGTTTCCCGTTAAAAAAATT…
P20_7_7	0.467318	10.558	1.62012	Y		Y	44.05	0.55311	58	6	0	-21	-8.34595	-9.9	-5.1	ATGAAACACATGCCACGCAAAATGTACTCGTGCGATTTCGAAACCACCACCAAGGTTGAGGATTGCAGGGTGTGGGCCTACGGCTATATGAATATTGAAGACCATAGCGAATATAAGATTGGCAATAGCCTGGATGAGTTCATGGCCTGGGTTCTGAAAGTGCAGGCAGACTTGTACTTTCACAACCTTAAATTTGACGGCGCTTTTATTATTAACTGGCTGGAACGCAATGGATTTAAATGGAGTGCCGATGGTCTGCCGAACACCTACAACACCATAATTTCACGCATGGGTCAATGGTACATGATCGATATCTGTCTGGGCTATAAGGGTAAACGCAAAATTCATACGGTGATTTACGATTCTCTGAAAAAGTTACCGTTTCCCGTTAAAAAAATT…
P7_20_20	1.36319	30.7982	1.51765	Y		Y	46.89	0.542489	64	7	0	-18.7	-9.02155	-6.5	-3.7	ATGAAACATATGCCACGTAAAATGTATAGTTGTGATTTTGAAACTACCACGAAAGTGGAAGACTGCCGGGTGTGGGCCTACGGCTACATGAACATTGAGGACCATTCGGAATATAAGATTGGCAACTCGTTAGACGAATTTATGGCCTGGGTTCTTAAAGTGCAGGCGGACTTGTACTTTCACAATTTGAAGTTCGATGGCGCTTTCATTATCAATTGGCTTGAGAGAAACGGCTTCAAATGGAGTGCCGATGGCCTTCCGAATACCTACAACACCATTATTAGCAGAATGGGCCAGTGGTATATGATCGACATTTGCCTGGGTTATAAGGGCAAGAGAAAAATTCACACCGTTATTTACGATTCGCTGAAAAAGTTGCCATTCCCGGTGAAAAAAATT…
P7_20_7	1.17652	26.5808	1.12077	Y		Y	44.92	0.531041	70	7	0	-19.2	-8.57552	-6.5	-3.7	ATGAAACATATGCCACGTAAAATGTATAGTTGTGATTTTGAAACTACCACGAAAGTGGAAGACTGCCGGGTGTGGGCCTACGGCTACATGAACATTGAGGACCATTCGGAATATAAGATTGGCAACTCGTTAGACGAATTTATGGCCTGGGTTCTTAAAGTGCAGGCGGACTTGTACTTTCACAATTTGAAGTTCGATGGCGCTTTCATTATCAATTGGCTTGAGAGAAACGGCTTCAAATGGAGTGCCGATGGCCTTCCGAATACCTACAACACCATTATTAGCAGAATGGGCCAGTGGTATATGATCGACATTTGCCTGGGTTATAAGGGCAAGAGAAAAATTCACACCGTTATTTACGATTCGCTGAAAAAGTTGCCATTCCCGGTGAAAAAAATT…
P7_7_20	0.442827	10.0047	1.01934	Y		Y	45.68	0.559142	52	5	0	-21	-8.75159	-6.5	-3.7	ATGAAACATATGCCACGTAAAATGTATAGTTGTGATTTTGAAACTACCACGAAAGTGGAAGACTGCCGGGTGTGGGCCTACGGCTATATGAATATTGAAGACCATAGCGAATATAAGATTGGCAATAGCCTGGATGAGTTCATGGCCTGGGTTCTGAAAGTGCAGGCAGACTTGTACTTTCACAACCTTAAATTTGACGGCGCTTTTATTATTAACTGGCTGGAACGCAATGGATTTAAATGGAGTGCCGATGGTCTGCCGAACACCTACAACACCATAATTTCACGCATGGGTCAATGGTACATGATCGATATCTGTCTGGGCTATAAGGGTAAACGCAAAATTCATACGGTGATTTACGATTCTCTGAAAAAGTTACCGTTTCCCGTTAAAAAAATT…
P_FreqC	1.1781	26.6165	3.44769	N		N	48.4	0.646216	34	0	4	-20.8	-8.77172	-13.21	-4.2	ATGAAGCATATGCCGCGTAAGATGTACTCCTGCGATTTTGAAACCACCACCAAGGTTGAGGATTGCCGTGTTTGGGCGTATGGTTACATGAACATCGAAGACCATAGCGAGTATAAGATTGGCAATTCCCTCGATGAGTTCATGGCGTGGGTTCTGAAGGTTCAGGCTGACCTCTATTTTCACAATCTCAAATTCGATGGCGCGTTCATCATCAATTGGTTAGAGCGTAATGGTTTTAAGTGGTCCGCGGACGGTTTGCCGAACACCTACAACACCATCATCTCCCGTATGGGCCAATGGTACATGATTGATATCTGCTTGGGTTACAAGGGCAAGCGCAAGATCCACACCGTTATCTACGACAGCTTAAAGAAACTGCCGTTTCCGGTTAAGAAGATT…
P19_2	nd	nd		N		N	44.17	0.588028	50	12	11	-19.2	-7.88481	-9.31	-6	ATGAAACATATGCCACGCAAAATGTACTCGTGCGACTTCGAAACCACCACCAAGGTTGAGGATTGCCGTGTTTGGGCATACGGTTATATGAACATCGAAGATCACTCTGAATACAAGATCGGTAACAGTTTAGATGAGTTCATGGCGTGGGTTCTGAAGGTGCAGGCTGATTTATACTTCCATAATTTGAAATTTGACGGCGCTTTTATTATCAATTGGCTGGAACGTAATGGATTTAAATGGTCAGCCGATGGCCTGCCGAATACCTATAACACCATCATTAGCCGTATGGGCCAATGGTATATGATCGATATTTGCCTGGGTTATAAAGGCAAACGCAAAATACATACTGTAATCTACGATAGCCTGAAAAAACTTCCGTTCCCCGTCAAAAAAATT…
P19_16	nd	nd		N		N	40.75	0.504085	80	0	9	-18.7	-7.58651	-9.31	-6	ATGAAACATATGCCACGCAAAATGTACTCGTGCGACTTCGAAACCACCACCAAGGTTGAGGATTGCCGTGTTTGGGCGTATGGTTATATGAATATCGAAGATCACAGTGAGTACAAAATCGGTAATAGCCTGGATGAGTTTATGGCGTGGGTGTTGAAGGTACAAGCTGATCTGTATTTCCATAACCTCAAATTTGACGGAGCTTTTATCATTAACTGGTTGGAACGTAATGGTTTTAAGTGGTCGGCTGACGGATTGCCAAACACATATAATACGATCATCTCTCGCATGGGACAATGGTACATGATTGATATCTGTTTAGGCTACAAAGGGAAACGTAAGATCCATACAGTGATCTATGACAGCTTAAAGAAACTGCCGTTTCCTGTTAAGAAGATC…
P19_11	nd	nd		N		N	46.02	0.798437	1	0	0	-18.5	-7.96262	-9.31	-6	ATGAAACATATGCCACGCAAAATGTACTCGTGCGACTTCGAAACCACCACCAAGGTTGAGGATTGCCGTGTTTGGGCGTACGGCTACATGAATATCGAAGACCACAGCGAGTATAAGATTGGTAATTCTCTGGACGAATTTATGGCCTGGGTTCTGAAAGTTCAGGCAGACCTGTACTTCCACAACCTGAAATTCGATGGTGCGTTTATCATCAACTGGCTGGAGCGCAACGGTTTTAAATGGTCTGCGGATGGTCTGCCAAACACCTATAACACTATCATCAGCCGCATGGGTCAGTGGTACATGATTGACATCTGCCTGGGTTACAAGGGTAAACGCAAGATCCACACTGTTATTTATGATTCCCTGAAAAAGCTGCCGTTTCCGGTTAAAAAAATT…
5'-term RNA																GGGGAATTGTGAGCGGATAACAATTCCCCTCTAGAAATAATTTTGTTTAACTTTAAGAAGGAGATATTACC
3'-term polymerase																TGATAAAGTGGCTCCAACACTTCCTACTAGCATAACCCCTTGGGGCCTCTAAACGGGTCTTGAGGGGTTTTTTGGAATTC
3'-term scFv																TAATGAGCGGCCGCAGTGGCTCCAACACTTCCTACTAGCATAACCCCTTGGGGCCTCTAAACGGGTCTTGAGGGGTTTTTTGGAATTC
