# Supplementary material for: Design Parameters to Control Synthetic Gene Expression in Escherichia coli
Source: PLoS One. 2009 Sep 14;4(9):e7002. doi: 10.1371/journal.pone.0007002 (PMC2736378; doi:10.1371/journal.pone.0007002)
Supplement: Table S2 — Codon Frequency Bias Tables. Two codon frequency tables were constructed as averages of the frequencies found in the best variants: FreqA from the 4 genes comprised of the 2 most highly expressing variants of each set (A1, A21, P19, and P20); FreqB from 10 of the most highly expressing variants (P19, P20, A1, A21, A1_14, A17_17_1, A17_1_1, A1_17_1, A1_11_11, and A_FreqA) and FreqC approximates the bias used to create polymerase variant P19. A fourth set of frequencies, “HiCAI” used codons that are most common in highly expressed native E. coli genes. (0.03 MB XLS) [file pone.0007002.s002.xls]

## Sheet: Supporting Table 2
		Frequency per Amino Acid
Amino Acid	Codon	FreqA	FreqB	FreqC	HiCAI
ALA	GCA	0.15	0.24	0	0.11
ALA	GCC	0.18	0.19	0	0
ALA	GCG	0.51	0.44	0.73	0.44
ALA	GCU	0.15	0.12	0.26	0.44
ARG	AGA	0.09	0.03	0	0
ARG	AGG	0.01	0	0	0
ARG	CGA	0	0	0	0
ARG	CGC	0.4	0.35	0.2	0.38
ARG	CGG	0	0	0	0
ARG	CGU	0.49	0.62	0.8	0.61
ASN	AAC	0.56	0.53	0.64	1
ASN	AAU	0.44	0.47	0.35	0
ASP	GAC	0.59	0.54	0.61	0.58
ASP	GAU	0.4	0.46	0.38	0.41
CYS	UGC	0.65	0.58	1	0.75
CYS	UGU	0.35	0.42	0	0.25
GLN	CAA	0.51	0.45	0.53	0.07
GLN	CAG	0.48	0.55	0.46	0.92
GLU	GAA	0.41	0.43	0.36	1
GLU	GAG	0.59	0.57	0.63	0
GLY	GGA	0.01	0	0	0
GLY	GGC	0.41	0.39	0.43	0.45
GLY	GGG	0.01	0	0	0
GLY	GGU	0.57	0.6	0.56	0.54
HIS	CAC	0.58	0.62	0.5	0.66
HIS	CAU	0.42	0.38	0.5	0.33
ILE	AUA	0	0	0	0
ILE	AUC	0.46	0.51	0.77	0.58
ILE	AUU	0.53	0.49	0.22	0.41
LEU	CUA	0	0	0	0
LEU	CUC	0.05	0.03	0.18	0
LEU	CUG	0.61	0.78	0.27	1
LEU	CUU	0.04	0.02	0	0
LEU	UUA	0.06	0.03	0.11	0
LEU	UUG	0.24	0.14	0.43	0
LYS	AAA	0.44	0.51	0.35	1
LYS	AAG	0.56	0.49	0.64	0
MET	AUG	1	1	1	1
PHE	UUC	0.58	0.55	0.5	0.55
PHE	UUU	0.42	0.45	0.5	0.44
PRO	CCA	0.15	0.1	0.13	0
PRO	CCC	0	0	0	0
PRO	CCG	0.72	0.81	0.86	1
PRO	CCU	0.13	0.09	0	0
SER	AGC	0.38	0.68	0.16	0.02
SER	AGU	0.01	0	0	0
SER	UCA	0.02	0.02	0	0
SER	UCC	0.25	0.13	0.58	0.45
SER	UCG	0.21	0.05	0.04	0
SER	UCU	0.12	0.1	0.2	0.51
THR	ACA	0	0	0	0
THR	ACC	0.63	0.57	0.91	0.65
THR	ACG	0.25	0.33	0	0
THR	ACU	0.11	0.1	0.08	0.34
TRP	UGG	1	1	1	1
TYR	UAC	0.57	0.58	0.57	0.61
TYR	UAU	0.42	0.42	0.42	0.38
VAL	GUA	0.08	0.03	0	0
VAL	GUC	0.22	0.28	0	0
VAL	GUG	0.38	0.34	0.4	0.41
VAL	GUU	0.31	0.35	0.59	0.58
